1

2 CNVmap: a method and software to detect and map copy number  
3 variants from segregation data

4

5

6 Matthieu Falque <sup>1\*</sup>, Kamel Jebreen <sup>1,2</sup>, Etienne Paux <sup>3</sup>, Carsten Knaak <sup>4</sup>, Sofiane Mezmouk <sup>4</sup>, and  
7 Olivier C. Martin <sup>1</sup>

8

9 \* Corresponding author: [matthieu.falque@inra.fr](mailto:matthieu.falque@inra.fr)

10 <sup>1</sup> GQE - Le Moulon, Université Paris-Saclay, INRA, CNRS, AgroParisTech, 91190 Gif-sur-Yvette,  
11 France

12 <sup>2</sup> Department of Mathematics, An-Najah National University, Nablus, Palestine

13 <sup>3</sup> GDEC, INRA, Université Clermont Auvergne, 63000 Clermont-Ferrand, France

14 <sup>4</sup> KWS SAAT SE & Co.KGaA, Grimsehlstr. 31, 37574 Einbeck, Germany

15

16

17

## 18 **Abstract**

19 Single nucleotide polymorphisms (SNPs) are widely used for detecting quantitative trait loci or for  
20 searching for causal variants of diseases. Nevertheless, *structural* variations such as copy-number  
21 variants (CNVs) represent a large part of natural genetic diversity and contribute significantly to trait  
22 variation. Over the past decade, numerous methods and softwares have been developed to detect  
23 CNVs. Such approaches are based on exploiting sequencing data or SNP arrays, but they bypass a  
24 wealth of information such as genotyping data from segregating populations, produced *e.g.* for QTL  
25 mapping. Here we propose an original method to both detect and *genetically map* CNVs using mapping  
26 panels. Specifically, we exploit the apparent heterozygous state of duplicated loci: peaks in  
27 appropriately defined genome-wide allelic profiles provide highly specific signatures that identify the  
28 nature and position of the CNVs. Our original method and software can detect and map automatically  
29 up to 33 different predefined types of CNVs based on segregation data only. We validate this approach  
30 on simulated and experimental bi-parental mapping panels in two maize and one wheat populations.  
31 Most of the events found correspond to having just one extra copy in one of the parental lines but the  
32 corresponding allelic value can be that of either parent. We also find cases with two or more additional  
33 copies, especially in wheat where these copies locate to homeologues. More generally, our  
34 computational tool can be used to give additional value, at no cost, to many datasets produced over the  
35 past decade from genetic mapping panels.

36

37 **Keywords:** Copy number variation (CNV); Segregating populations; Allele frequency profiles; Non-  
38 Mendelian markers

## 39 **Introduction**

40 Single Nucleotide Polymorphisms (SNPs) are typically exploited *via* genotyping technologies, such as  
41 arrays or Genotyping by Sequencing, leading to high-density information on such polymorphisms. The  
42 wide availability of such tools explains why polymorphisms are principally characterized at this SNP  
43 level, even though it is known in many species that there is also a great deal of *structural*  
44 polymorphism across genomes. Generally one uses the terminology "structural variation" (SV) when  
45 there are inversions, translocations, insertions, deletions, or duplications involving segments of over  
46 1000 base pairs. Identifying such SVs is a current challenge, rendered difficult by the so-called  
47 "complexity" of large genomes that involve many repetitive sequences, generally associated with  
48 transposable elements. Work on identifying SVs includes in particular searching for Copy Number  
49 Variations (CNVs) (Redon *et al.* 2006) and Presence/Absence Variations (PAVs) (Alkan *et al.* 2011). In  
50 CNVs, a gene or segment of DNA is present in different numbers of copies in two genomes. CNVs  
51 have been discovered in numerous species, and in particular in mammals (Guryev *et al.* 2008; Conrad  
52 *et al.* 2010). In PAVs, a gene or DNA segment is present in one genome and missing in the other. It has  
53 been claimed that more nucleotide bases are affected by SVs than by SNPs (Zhang *et al.* 2009). Both  
54 CNVs and PAVs are associated with phenotypic variations and diseases (Beckmann *et al.* 2007; Zhang  
55 *et al.* 2009), making them a focus of much current research. A large number of approaches have been  
56 used to detect structural variations. Perhaps the oldest is based on competitive hybridizations to  
57 oligonucleotide probes as occurs in comparative genomic hybridization (CGH) arrays (Beló *et al.* 2009;  
58 Springer *et al.* 2009). A somewhat different technique is used in SNP arrays where individual samples  
59 are genotyped (no competition between samples). In such arrays, a fluorescence intensity is associated  
60 with each allele of a SNP; by following these intensities for successive SNPs along the genome, it is

61 possible to identify regions in which the signal is anomalously low for all alleles, indicative of a PAV,  
62 or in which some intensities are a few fold higher than expected, indicative of a CNV (Colella *et al.*  
63 2007; Cooper *et al.* 2008). Later approaches involve exploiting sequencing read depth (Bailey *et al.*  
64 2002; Yoon *et al.* 2009; Alkan *et al.* 2009), unexpected mappings of read pairs (Chen *et al.* 2009; Pang  
65 *et al.* 2010), split reads (Mills *et al.* 2006; Ye *et al.* 2009), and sequence-based reassembly (Zerbino and  
66 Birney 2008; Chaisson *et al.* 2009; Simpson *et al.* 2009; Li *et al.* 2010). Each approach has its  
67 advantages (Alkan *et al.* 2009; Sudmant *et al.* 2010) and continues to undergo optimization (Zare *et al.*  
68 2017). Our work takes a novel approach, different from all that we listed above, and gives "a second  
69 life" to SNP genotyping technologies in the specific context of populations in segregation. Indeed, SNP  
70 arrays have been available at low cost for several years now and so have been used rather extensively  
71 to genotype segregating populations. Such populations are typically constructed for mapping  
72 quantitative trait loci (QTLs) for fundamental research or for breeding programs. Interestingly, such  
73 technologies provide, in the context of segregating populations, information on structural variation  
74 between the founding parents used to build the population. However, that information is hidden within  
75 the markers showing non-Mendelian segregation patterns, markers that generally are discarded early-on  
76 in the linkage mapping analyses. The present work provides a methodology for inferring certain types  
77 of SVs based on those non-Mendelian markers in bi-parental mapping populations. We will stress the  
78 CNV cases, because in such situations the previously unknown copies of the region can also be  
79 *mapped* based on the linkage disequilibrium analyzed from the segregation data. Indeed, our approach  
80 exploits particular *profiles* of allele frequencies arising along the genome, somewhat analogously to  
81 what is done in genome-wide association studies. However, in our case, instead of working with the  
82 genotype at a single marker at a time, we work with compound genotypes involving multiple markers.  
83 The profiles built in this way exhibit peaks at the loci where the extra copies arise and provide

84 signatures allowing the identification of the type of SV involved. These additional loci should not be  
85 too close in genetic distance to the reference locus because, as we shall see, it is the recombinations  
86 between these loci in the population that lead to the characteristic signal.

87 Any marker that deviates strongly from Mendelian behavior in a segregating population points to a  
88 potential SV. The simplest context in which to understand how to exploit a non-Mendelian signal is to  
89 consider the case of doubled-haploid (DH) plant populations in segregation. Indeed, in that type of  
90 population where homozygous individuals are derived from single meiotic products by chromosome  
91 doubling, all of the Mendelian markers should show full homozygosity while SVs and more  
92 specifically CNVs will lead some individuals to appear as being heterozygous at markers involved in  
93 rearrangements. Therefore, we begin our study here using a doubled haploid (DH) population  
94 consisting of 625 maize individuals; we refer to it as the GABI population. We will also show how our  
95 approach can be used in the context of RIL (Recombinant Inbred Line) and IRIL (Intermated  
96 Recombinant Inbred Line; (Lee *et al.* 2002)) populations. The maize IRIL population studied in this  
97 paper is the IBM (Ganal *et al.* 2011) mapping population. We also study a RIL wheat population  
98 (Choulet *et al.* 2014; Rimbart *et al.* 2018), hereafter referred to as WHEAT. The markers in these RIL  
99 and IRIL populations have residual heterozygosity because the number of generations of selfing used is  
100 not so large. Such blocks of markers with residual heterozygosity might be expected to swamp any SV  
101 signal; interestingly this turns out not to be true. We will (1) demonstrate the efficiency of our approach  
102 on our three populations that include two situations with this potential problem, (2) show that the allele  
103 frequency profiles are fully compatible with the inferred CNVs by comparing those profiles to the ones  
104 produced from simulated populations, and (3) compute  $p$ -values associated with the  $H_0$  hypothesis that  
105 the observed profiles occurred by chance in the absence of SV. As a first illustration, we apply our  
106 method and software to the GABI maize DH population, revealing striking signals of duplications and

107 triplications, the corresponding copies arising on a *common* chromosome not more often than by  
108 chance. Then we examine the case of recombinant inbred lines (RILs or IRILs); as expected, having  
109 residual heterozygosity makes the problem more challenging but our method generalizes well. Indeed,  
110 in the IBM and WHEAT experimental populations, we are able to identify unambiguous signatures of  
111 copy number variations. Interestingly, in the WHEAT data set we find a large number of triplicated loci  
112 that involve the homeologous chromosomes. Finally, we assess the candidate CNVs in the IBM  
113 population using reference genome sequences of the parents.

114

## 115 **Materials and Methods**

### 116 *Aim and design of the study*

117 The locus-specificity of genetic markers used for genotyping, be they PCR-based or array-based,  
118 mostly relies on oligonucleotides hybridizing to sequences flanking the SNP of interest. In the case of  
119 duplicated regions, such oligonucleotides may find alternative targets, messing up the interpretation of  
120 the observed raw data (mostly fluorescence intensities at two wavelengths), which usually assumes a  
121 single target locus. This results in apparent non-Mendelian behaviours of some markers, which are  
122 usually filtered out from data sets before using them for mapping or QTL analyses. The goal of this  
123 work was to exploit these types of data sets to infer markers involved in SVs and genetically map the  
124 previously unknown copies, providing a software package to do so automatically. This software is  
125 provided as a R package named CNVmap, provided in Supplementary File S1 (see Supplementary  
126 File S6 for installation). More detailed explanations about the functionalities and procedures of this  
127 software are provided in the package *via* the embedded documentation of the associated functions.

128 In our approach, we focus on non-Mendelian markers to provide and test appropriate hypotheses,  
129 interpreting the observed segregations as CNV events polymorphic between the parents used to  
130 generate segregating populations. The main signature of such events being apparent heterozygous calls,  
131 we therefore worked with segregating populations in which the individuals are almost fully  
132 homozygous, like doubled-haploid or recombinant inbred populations. In such populations, high levels  
133 of heterozygous calls in some markers strongly point to possible CNVs containing those markers.  
134 Because some systematic or random errors in the genotyping process can also lead to unexpected  
135 heterozygotes, we extended our approach to a joint analysis of each candidate marker with its local  
136 allelic context, which provides multiple and unambiguous signatures that make up strong evidence for  
137 the reality of the event. Moreover, this approach (implemented in our software) also provides the  
138 genomic localization of the other loci involved in the CNV.

#### 139 *Populations and segregation data used*

140 The population mainly used in this study is a Doubled Haploid (DH) maize population called GABI  
141 (Presterl *et al.* 2007), from which genotyping data were kindly provided by KWS SAAT SE &  
142 Co.KGaA (Einbeck, Germany). The GABI population contains 625 DH lines, which were genotyped  
143 using the Illumina MaizeSNP50 array (Ganal *et al.* 2011). Second, we also studied the maize IBM  
144 population (Ganal *et al.* 2011) which is is an Intermated Recombinant Inbred Line (IRIL) population  
145 obtained by intermating F2 individuals for four generations to accumulate recombination, before  
146 beginning the selfing generations used to fix the material (Lee *et al.* 2002). The IBM population  
147 contains 239 RILs, which were genotyped using the same SNP array and cluster file as for GABI.  
148 Lastly, we studied a wheat population consisting of, 406 F6 individuals derived from a cross between  
149 Chinese Spring and Renan; these were genotyped using the TaBW280K SNP array (Rimbert *et al.*

150 2018). Marker segregation data for populations GABI, IBM, and WHEAT are respectively provided in  
151 Supplementary Files S2, S3, S4.

### 152 *Linkage map construction*

153 Our method and software to detect CNVs requires prior knowledge of the order and genetic position of  
154 the markers. The genetic maps used to analyze the GABI and IBM segregation data were thus first  
155 obtained using a seriation approach implemented in R scripts calling functions from the CartaGene  
156 software (de Givry *et al.* 2004), as described in Ganal *et al.* (Ganal *et al.* 2011). The genetic map  
157 used to analyze the segregation data of the WHEAT population were produced using the software  
158 MSTmap (Wu *et al.* 2008) with the following default parameters: population type: RIL6; distance  
159 function: Kosambi; cut-off: 0.0000000001; map dist.: 15; map size: 2; missing threshold: 0.20;  
160 estimation before clustering: yes; detect bad data: yes; objective function: ML (Rimbert *et al.* 2018).  
161 Linkage map data for populations GABI, IBM, and WHEAT are respectively provided in  
162 Supplementary Files S2, S3, and S4.

### 163 *Raw data filtering*

164 In DH populations, each normal marker should be homozygous in every offspring. The possible calls  
165 for any marker are then "A" (the allele attributed to parent 1) or "B" (the allele attributed to parent 2). It  
166 is important to keep in mind that a call of a SNP is the result of an elaborate identification process  
167 which is not 100% reliable so that one cannot exclude a low proportion of errors, leading for instance  
168 to some small proportion of "H" calls (heterozygous, which should almost never happen in a DH  
169 population if there is no genotyping error) or "-" for missing data if the calling is too ambiguous. In  
170 practice, we do see heterozygous markers in spite of each individual being homozygous. Such cases



171 might be erroneous calls or indicative of regions belonging to SVs. Beyond possible errors in the calls  
172 for certain markers, some individuals of the population may themselves be corrupt (e.g. through pollen  
173 contamination). A strong indication of this is if an offspring has an anomalously large number of  
174 markers that are called "H". We thus apply some quality filtering on the data sets, both at the level of  
175 the individuals (e.g. we cast out individuals having too high heterozygosity rates) and at the level of  
176 markers. In the R code, the user can change the thresholds for such filterings, for instance based on  
177 minor allele frequency or genotype frequencies (see all parameter descriptions in the R package).

#### 178 *Defining the Mendelian and candidate markers*

179 Given the markers passing the previous test, we now divide them into three classes: "Mendelian",  
180 "candidate", and "other". Our procedure for defining the first or second class of markers is based on  
181 forcing them to be respectively "typical" and "atypical" for some statistic while the "other" markers are  
182 all the ones that do not pass these tests. Our first statistic is the fraction of individuals that are  
183 heterozygous. We require that this fraction be in the bottom  $X_H$  percentile for "Mendelian" and in the  
184 top  $Y_H$  for "candidate" markers. We do the same thing (but with different thresholds) using the fraction  
185 of individuals that are called missing for that marker. Our use of percentiles has the advantage that it  
186 automatically takes into account the properties of the population, such as the low numbers of  
187 heterozygotes in DH populations and the significantly larger numbers arising in RILs that have not  
188 reached fixation. Clearly, as the threshold  $Y_H$  is lowered, the number of candidate markers will increase  
189 so if one wants to find as many events as possible pointing to SVs it is good to not take  $Y_H$  too large. In  
190 contrast, the potential number of Mendelian markers is quite substantial so it is not a problem to be  
191 rather stringent for the value of  $X_H$ .

192 *Automatic detection of peaks in the allele profiles*

193 For each candidate marker  $M^*$  we identify its flanking Mendelian markers  $M_L$  and  $M_R$  from which we  
194 identify the individuals in the population belonging to each of six associated 3-marker genotype classes  
195 (see Supplementary File S5). Then for each of these six classes we compute the corresponding genome-  
196 wide allele profile using the *Mendelian* markers only, each marker leading to a frequency defined as the  
197 number of individuals carrying the A allele divided by the number of individuals carrying either the A  
198 or B alleles. These six genome-wide allele profiles along chromosomes are then analyzed for  
199 occurrences of peaks. Roughly a peak can be defined *via* a region on the genome in which the allele  
200 frequency curve has a pointed shape and approaches very close to 0 or 1. In practice, to avoid being  
201 sensitive to noisy or erroneous data, we get rid of outliers by a first filter. That means producing a first  
202 smoothed version of the allele curve using splines (*smooth.spline()* function in R) and throwing out the  
203 data points that are outliers with respect to that curve. Second, a new smoothed curve is generated  
204 using the remaining markers. Then all regions for which this new smoothed curve is close enough to 0  
205 or 1 are identified. A linear fit of the data (outliers excluded) is performed on each side of the putative  
206 peak to determine its expected position, and also to assess the quality and slope of the linear regression  
207 on both sides of the peak (or on one side only if the peak is at the extremity of a chromosome, or close  
208 to another peak). Then the list of all peaks for all six classes are compared to see whether peaks co-  
209 localize. This leads to a list of peaks (genetic positions on the genome) with each peak being called as  
210 "present" or "absent" for each of the six allele frequency curves. Note that if a class contains no  
211 individuals it is just ignored (see Supplementary File S5). Furthermore, when there are few individuals  
212 in a class, the associated allele frequency curves are noisy and thus will have peaks by chance. We thus  
213 only consider classes having a minimum number of individuals, this minimum being determined so that

214 by the Bonferroni test one has a false discovery rate for peak detection that is 5% under the hypothesis  
215 that there is no structural variation present.

#### 216 *Automatic assignment to a type of CNV event*

217 Once all peaks have been detected, for the associated locus the presence or absence of peaks or troughs  
218 for the list of 6 different 3-marker genotype classes of individuals was encoded with a 6-character  
219 string. The list of these strings (one per locus) provided the observed signature of the event. This  
220 signature was then compared by the software with a list of 33 predefined signatures (details provided as  
221 Supplementary File S5), and in case of a match between the observed signature and a predefined one,  
222 then the event was assigned to the corresponding type. The predefined signatures were based on  
223 theoretically expected patterns arising from CNVs involving additional copies at one or two loci. Such  
224 signatures depend on the allelic content at these different loci, leading us to introduce below a  
225 schematic notation for CNV events.

#### 226 *Nomenclature used for the different types of CNVs*

227 In the following, a CNV involving in parent 1 X doses of the genomic region of interest and Y doses in  
228 parent 2 will be referred to as a "X:Y CNV" (X and Y being equal to 1, 2, or 3). Moreover, each CNV  
229 category is encoded as a string of 2 to 3 groups of 3 characters, there being one group per locus, each  
230 separated by an underscore. Each group contains the parental alleles separated by a slash, so the result  
231 takes the following form: A group of 3 characters specifies the alleles carried at the considered locus by  
232 parents 1 and 2, in that order, separated by a slash, A being the reference allele of M\* in parent 1 and B  
233 being the reference allele of M\* in parent 2. The different groups are further concatenated using the  
234 underscore as a separator for the successive loci: locus1(P1/P2)\_locus2(P1/P2)\_locus3(P1/P2). The

235 first group is always encoded "A/B" and indicates the reference locus, located at the position where the  
236 candidate marker was initially mapped. Further groups indicate the different additional loci carrying  
237 copies of the region targeted by the candidate marker. So for instance for a 2:1 CNV of type A/B\_B/-  
238 the Parent 1 has two copies of the considered genomic region but the copy at the second locus carries  
239 the allele B, while the Parent 2 has only one copy.

#### 240 *Analyzing candidates based on missing data*

241 Our method is based on the detection of candidate markers for which the number of H calls is  
242 anomalously high, followed by an analysis of each associated genome-wide allelic profile. However,  
243 when for completeness we tried to analyze allelic profiles for *all* markers, we discovered clear CNV-  
244 like signatures for some markers with little or no H calls but with large numbers of missing data. In  
245 such cases, instead of the AHA or BHB 3-marker genotypic class, the peaks were observed on the  
246 allelic profiles associated with A-A or B-B classes suggesting that one had a CNV but where, for  
247 unknown reasons, the H calls for the candidate marker were transformed into missing data calls. So we  
248 specified in the software the signatures that would arise from having H calls be erroneously modified  
249 and denoted them by adding a suffix to their putative CNV type. The suffix was "|Hm" when (part of)  
250 the expected H calls have been turned into missing data calls (with probability  $p_{Hm}$ ), and "|HmHa"  
251 respectively "|HmHb" when the expected H calls have been turned partly into missing data calls (with  
252 probability  $p_{Hm}$ ) and partly into A respectively B homozygote calls (with probabilities  $p_{Ha}$  respectively  
253  $p_{Hb}$ ).

254 To simulate such events, we first estimated the probabilities  $p_{Hm}$ ,  $p_{Ha}$ , and  $p_{Hb}$  from the data for the  
255 marker considered based on the allelic profiles at the inferred peaks. We then simulated the CNV event  
256 as explained below. Finally, we introduced systematic "errors" to the resulting candidate marker

257 genotype depending on the type of the putative CNV event with its suffix. Specifically, we randomly  
258 transformed the H calls into missing data, A, or B calls according to the probabilities  $p_{Hm}$ ,  $p_{Ha}$  and  $p_{Hb}$ .

### 259 *Producing simulated datasets*

260 We produced simulated data staying as close as possible to the experimental population parameters,  
261 keeping the same marker positions on the genetic maps of each chromosome and the same population  
262 size. We simulated the exact same scheme of crossings as the one used to produce the experimental  
263 populations, implementing *in silico* crossovers that can arise in each marker interval during each  
264 meiosis based on the experimental genetic map. Crossover interference was also implemented using the  
265 Gamma model (McPeck and Speed 1995) whose parameter  $nu$  can be set as a parameter in our  
266 software (for typical values of  $nu$  in maize, see (Falque *et al.* 2009)). This implementation of  
267 interference proved to be important for having comparable peak width between experimental and  
268 simulated profiles. To simulate any particular CNV hypothesis, we implemented into the parental  
269 genomes the associated duplications or triplications of the marker  $M^*$  of interest, using positions of loci  
270 inferred from the analysis of the actual experimental population. The corresponding modified parental  
271 genomes thus had extra fictitious markers each tagged with the parental allelic value (and thus  
272 independent of the CNV hypothesis). For instance in the case of a duplication in Parent A but with  
273 opposite allele (CNV of the type A/B\_B/-), the extra marker had nevertheless allele A in parent A and  
274 allele B in parent B. Then the scheme of crossings was simulated based on these modified parental  
275 genomes (note that the genetic map was also modified but just by the inclusion of the extra markers at  
276 their inferred positions). Lastly, the individuals in the resulting population were "genotyped" *in silico*.  
277 For the markers that were not involved in the CNV, this was straightforward. However, to genotype an  
278 individual for the marker  $M^*$ , it was necessary to take into account allelic values not only at  $M^*$  but

279 also at the extra copy or copies of the marker, to mimic the fact that oligonucleotides used for  
280 genotyping  $M^*$  would hybridize on all copies. This was where the actual CNV hypothesis intervened  
281 because the "raw" genotypes at each extra marker as produced by the simulation had to be reinterpreted  
282 using the CNV allelic content. Specifically, the call of the marker  $M^*$  had to be changed to H if and  
283 only if the reference locus was not already H and both A and B alleles were present in the reinterpreted  
284 individual when considering  $M^*$  and all of its copies. As an illustration of this rule, consider again the  
285 CNV of the type A/B\_B/-. The only situation requiring that a call of  $M^*$  be changed to H is when the  
286 raw genotype is A at the first locus and also A at the second. In practice we apply such "transformation"  
287 rules using successively each of the extra copies of the marker, each time testing whether the  
288 genotyping should be changed to H. Once that is done, the extra copies are removed from the data set  
289 and only the original markers and associated modified calls are used as input to the analysis program,  
290 leading to production of corresponding genome-wide allelic profiles based on these simulated data sets.  
291 A good agreement between profiles produced from the experimental and simulated data sets then  
292 provides strong support for the hypothesized CNV.

### 293 *Calculation of p-values associated with the hypothesis $H_0$ of no structural variation*

294 Although having the simulated profiles allows one to get a feeling for whether a proposed CNV is  
295 plausible through consistency between theory and experiment, it is appropriate to also compare to the  
296 null hypothesis  $H_0$  whereby there is no CNV and the marker  $M^*$  is present in only one copy in both  
297 parents. Under that hypothesis, the additional peaks in the experimental allelic profiles are simply due  
298 to stochasticity in the segregation, a situation that will be a problem whenever relatively few  
299 individuals contribute to these profiles. The CNVmap package provides a test of  $H_0$  in the form of a  $p$ -  
300 value that is computed as follows. Let  $M^*$  be the considered marker that is a candidate for belonging to

301 a region involved in a CNV. In our first step we identify within the whole population two sub-classes of  
302 individuals: the ones for which the flanking (Mendelian) markers of  $M^*$  are both called as A alleles,  
303 and the ones for which those markers are both called as B alleles. Not all individuals fall within one of  
304 these classes, so for instance if for an individual one flanking marker is heterozygous, or if one is A and  
305 the other is B, then the individual is not further considered. Within each sub-class, the errors  
306 (heterozygous and/or missing data calls) under  $H_0$  are random. Thus the second step of our procedure is  
307 to produce a simulated dataset by shuffling the calls of  $M^*$  separately in each of the two sub-classes of  
308 individuals defined in the first step. Under  $H_1$  (presence of a CNV) the  $M^*$  calls are correlated with the  
309 calls at the second locus, while under  $H_0$  ( $M^*$  is single-locus in both parents) there is no such second  
310 locus. The third step is to apply our analysis pipeline to this shuffled dataset and identify the peaks in  
311 the allelic profiles. The second and third step are repeated a large number of times (this number is  
312 specified by the user and computed *via* parallelization). Lastly, the  $p$ -value for rejecting the hypothesis  
313  $H_0$  is obtained from the fraction of the shufflings that lead to having additional peaks in the allelic  
314 profiles.

### 315 *Use of parental genome sequences for validating CNVs predicted from the IBM population*

316 To provide independent validation of CNVs detected with our software, we examined the whole-  
317 genome sequence assemblies of the two parents (B73 and Mo17) used to produced the IBM population.  
318 First, for each non-Mendelian marker  $M^*$  identified with our software as being located in a 1:2 or 2:1  
319 CNV, we extracted from the B73 sequence *three* regions 201 bp long (100bp before and 100bp after the  
320 SNP) flanking not only the marker  $M^*$  (indicating the reference locus) but also each of the two markers  
321 ( $M_{\text{left\_peak}}$  and  $M_{\text{right\_peak}}$ ) delimiting the second locus (identified automatically in our software *via* the  
322 corresponding fitted peak positions). To do that, we used the V2 version of the B73 genome assembly

323 (AGPv2 RefGen\_v2 [https://www.maizgedb.org/genome/genome\\_assembly/B73%20RefGen\\_v2](https://www.maizgedb.org/genome/genome_assembly/B73%20RefGen_v2))  
324 because the physical coordinates of the MaizeSNP50 SNPs are given on that V2 version (Ganal *et al.*  
325 2011). Then, for our CNV validation, we BLASTed these three 201bp sequences against the B73  
326 AGPv4 RefGen\_v4 Maize genome assembly (the most recent available assembly  
327 [https://www.maizgedb.org/genome/genome\\_assembly/Zm-B73-REFERENCE-GRAMENE-4.0](https://www.maizgedb.org/genome/genome_assembly/Zm-B73-REFERENCE-GRAMENE-4.0)) using  
328 default parameters. We then considered that the presence of a second copy in B73 was validated if one  
329 of the high-scoring pairs (HSP) returned by BLAST for the M\* flanking region was on the same  
330 chromosome as the second locus and was included in the confidence interval of that locus (based on  
331 coordinates of HSPs obtained when BLASTing M<sub>left\_peak</sub> and M<sub>right\_peak</sub> flanking regions). Presence of  
332 the second locus in B73 is expected in 2:1 CNVs but not in 1:2 CNVs. We proceeded similarly for  
333 testing the presence of both loci in the Mo17 parent, except that we first extracted the three 201bp  
334 regions of Mo17 corresponding to M\*, M<sub>left\_peak</sub> and M<sub>right\_peak</sub> markers by BLASTing the 201bp B73  
335 regions against the Mo17 genome ([https://www.maizgedb.org/genome/genome\\_assembly/Zm-Mo17-](https://www.maizgedb.org/genome/genome_assembly/Zm-Mo17-REFERENCE-CAU-1.0)  
336 [REFERENCE-CAU-1.0](https://www.maizgedb.org/genome/genome_assembly/Zm-Mo17-REFERENCE-CAU-1.0)). We then BLASTed those 201bp Mo17 sequences against the Mo17 genome  
337 assembly. The second locus is then expected to be present in Mo17 in 1:2 CNVs but not in 2:1 CNVs.

### 338 *Availability of data and material:*

339 All data generated or analysed during this study are included in this published article and its  
340 supplementary information files (software provided as Supplementary File S1 and data sets provided as  
341 archives in Supplementary Files S2, S3, and S4). All Supplementary Figures, Tables, and Files have  
342 been uploaded to FigShare.

343



344

## 345 **Results**

### 346 *Genome-wide allele frequency profiles identify the loci involved in CNVs*

#### 347 *Strikingly clean signatures for 1:2 or 2:1 CNVs*

348 What should be expected in a segregating population if only one of the parents has a marker  
349 duplicated? The simplest situation is schematically represented in Fig. 1A where in parent 1 (with  
350 alleles denoted "A") a DNA segment carrying the SNP has been duplicated producing an insertion in  
351 some other place in the genome. The marker involved in this duplication is labeled  $M^*$  and can be  
352 thought of as having been identified as a "candidate" marker given its non-Mendelian behavior in terms  
353 of heterozygote calls (see Materials and Methods) while  $M_L$  and  $M_R$  correspond to its flanking  
354 Mendelian markers that are thus *not* part of the duplication. The region where the  $M^*$  locus was  
355 initially mapped will hereafter be referred to as the "reference locus". In Fig. 1A we assume that only  
356 Parent 1 carries the duplication and this duplicate copy has the allele of that same parent. For the  
357 purposes of the figure, we only represent  $M^*$  in this duplication but other markers can very well be  
358 implicated too and if this is so one has even more evidence that there is a CNV. After crossing these  
359 two homozygous parents to produce an F1 individual, meiosis of the F1 leads to gametes that may  
360 shuffle the alleles of the parental chromosomes. In the case of a DH population, these gametes are used  
361 to produce diploid plants whose genomic content is that of a gamete but simply doubled. For the  
362 situation depicted in Fig. 1A where we focus on the reference locus and the duplication, the (gametic or  
363 DH) associated segregation patterns fall into 4 categories. Assuming that these two loci are on different  
364 chromosomes (or far enough away from each other on the same chromosome), the genotyping of these

365 plants will generate a call for  $M^*$  that will be "A" 50% of the time, "B" 25% of the time and "H" 25%  
366 of the time. Thus the marker will be detected as anomalous (non-Mendelian) in this mapping  
367 population, having too many "H" calls, and this is the simplest situation for which our method allows  
368 one to map the second locus. As indicated in Fig. 1A, we introduce the associated 3-marker genotype  
369 classes based on the alleles arising for the  $M_L$ ,  $M^*$ , and  $M_R$  markers. The CNV situation depicted in  
370 Fig. 1A will lead to a characteristic signature when considering the genome-wide allele frequency  
371 profiles. To illustrate this, we simulated a DH population with the same characteristics as GABI, taking  
372 a marker  $M^*$  from chromosome 4 (specifically marker PZA-000492026) and then we duplicated it onto  
373 chromosome 5. The resulting allele frequency profiles are displayed in Fig. 1B. To construct the  
374 profiles, we first assigned the individuals of the simulated population to one of the 6 classes defined via  
375 the 3-marker genotypes  $M_L M^* M_R$ . There are 6 classes because  $M^*$  can be A, B or H while we impose  
376  $M_L$  and  $M_R$  to be of the same parental type because in practice these markers are very close on the  
377 chromosome (because of that proximity, almost all individuals in the population will satisfy the  
378 imposed property and so in practice this restriction serves really to filter out cases that have been  
379 improperly mapped). Then for each class of individuals, we determine the allele frequency of all the  
380 Mendelian markers genome-wide (0 means only the B allele arises for the considered marker, 1 means  
381 only the A allele arises, *cf.* Materials and Methods), and plotting these leads to the allele frequency  
382 profiles as displayed in Fig. 1B. The x-axis is the cumulated genetic position for each of these  
383 Mendelian markers. Also displayed are the corresponding smoothed frequency curves as well as the  
384 allele frequency obtained without separating the individuals into the 3-marker genotype classes (dashed  
385 black curve). In this example the BHB curve has a peak (pointing down) on chromosome 4 as expected  
386 (the reference locus for  $M^*$ ) but also a second peak pointing up on chromosome 5. This peak is  
387 corroborated with that of the BBB curve (down) at that same position. We can thus say that the BHB

388 and BBB curves together provide strong evidence for a 2:1 CNV of the A/B\_A/- type, where the  
389 reference locus is normal (A/B; parent 1 having allele A and parent 2 having allele B) while the second  
390 locus involves a duplicate copy (A/-; carried by parent 1 only and where the copy has the allele of  
391 Parent 1 for the reference marker M\*; see detailed explanation of the encoding in Materials and  
392 Methods). In such a notation, four different possible 1:2 or 2:1 CNV types are enumerated in the form  
393 A/B\_-/A, A/B\_A/-, A/B\_-/B, and A/B\_B/-.

394 Analysis of the GABI data leads to many markers M\* compatible with scenarios like that of Fig. 1 or  
395 their analogs under parental or allele exchange. For instance in Fig. 2A we show the profiles for a case  
396 that was detected as a 1:2 CNV with the duplicated locus within parent 2 but carrying the allele A. For  
397 completeness, we show further examples in Supplementary Figure S1 to cover all four types of 1:2 or  
398 2:1 CNVs. In all these cases, the hashed rectangles at the peaks delimit the regions where the software  
399 localized each of the two loci by using the profile shapes in the neighborhood of these peaks (see  
400 Materials and Methods). Furthermore, to add credence to the different CNV claims when analyzing the  
401 data, we systematically provide simulations to determine the *expected* profiles under the hypothesis of  
402 the inferred scenario. Specifically, our software produces a simulated segregating population using the  
403 same number of individuals and the same marker positions as in the experimental data set but including  
404 one or more duplicate copies of M\* at the position(s) predicted by the scenario (see Materials and  
405 Methods for a detailed explanation). Fig. 2B thus shows the expected profiles in the 1:2 CNV inferred  
406 from Fig. 2A while Supplementary Figure S1 includes the simulation for each of the four types of 1:2  
407 or 2:1 CNV. If the result of a simulation shows patterns of peaks very close to the experimental ones,  
408 then one can have high confidence in the proposed CNV hypothesis.

409 The computer generation of all the profiles presented in this paper were obtained using the R package  
410 CNVmap available as Supplementary File S1.

411 *The two loci of 1:2 or 2:1 CNVs sometimes arise on the same chromosome*

412 The examples just shown had the duplicated locus on a different chromosome from the reference locus,  
413 but we also found other cases where the two peaks lay on the *same* chromosome. For illustration, we  
414 show such a case in the GABI population in Fig. 2C, the candidate marker being SYN7974. As in the  
415 previous case, our software produces a plot of the allele frequency profiles both for the experimental  
416 data and for a simulated data set given the inferred scenario which for Fig. 2C is A/B\_B/-, both loci  
417 lying within chromosome 2. Clearly, the simulated profiles that are shown in Fig. 2D have all the  
418 qualitative properties seen in the experimental data, providing strong evidence that the parent 1 really  
419 does have a duplication of the region containing the SYN7974 marker and that the corresponding allele  
420 is that of parent 2. Compared to the case where the two loci are on different chromosomes, the expected  
421 proportion of individuals carrying the heterozygote signal is reduced: instead of the theoretical 25%, it  
422 is  $r/2$  where  $r$  is the recombination rate between the two loci. Whenever these two loci are very close,  
423 the number of such recombinant individuals will be low and so it will be much more difficult to argue  
424 that there is a real CNV vs simply a few genotyping errors.

425 *Allele frequency profiles reveal different types of 1:3 or 3:1 CNVs*

426 Our software is set up to detect any number of peaks in the allele frequency profiles. Thanks to this  
427 feature, we found multiple cases where there were three separate loci. We illustrate such a situation in  
428 Fig. 2E in the GABI population for marker PZE-105075897, where the reference locus is on  
429 chromosome 5, and two additional copies were detected on chromosomes 3 and 7. The software  
430 automatically identifies this as an A/B\_-/B\_-/A, which means that the parent 1 has no additional copy

431 while the parent 2 has two additional copies: one on chromosome 3 with allele "B" and one on  
432 chromosome 7 with allele "A". Note that the peaks localizing these additional copies arise from the 3-  
433 marker genotypic classes AAA and AHA on chromosome 3, and the 3-marker genotypic classes BBB  
434 and BHB on chromosome 7. Again, to have a high level of confidence that the patterns observed have  
435 been properly interpreted, one can compare with the results of a simulation as was done in the previous  
436 figures. The result of simulating the triplication inferred from Fig. 2E is displayed in Fig. 2F, showing  
437 that the 1:3 CNV hypothesis is indeed strongly supported by the experimental data because of the high  
438 similarity between the Figs. 2E and 2F. Note that it is possible to show that the theoretical frequencies  
439 of the AAA, AHA, BBB, and BHB genotypes are 1/4, and of course this result agrees with what we see  
440 at the top of Fig. 2F and is not far from what is observed in the experimental case. In Supplementary  
441 Figure S2 we display similar cases but arising this time in the WHEAT population, corresponding to  
442 three-locus events of the types A/B\_-/A\_-/A, A/B\_A/\_/\_/A, A/B\_A/\_/\_A/\_, A/B\_B/\_/\_/B, and A/B\_B/\_/  
443 \_B/\_. Note that in all these last cases for which one of the alleles arises solely at the reference locus, the  
444 additional loci are identified only through one of the 3-marker genotypic classes, the classes having  
445 heterozygotes giving rise to enhanced frequencies at those two loci but not reaching the 100% value  
446 (see Supplementary Figure S2). The reasons one has enhancement but not a saturated peak or trough is  
447 that the constraint of capturing the multiple-copy allele can be satisfied at *either* of the two additional  
448 loci.

449 *Missing data also can provide convincing signatures for 1:2 or 2:1 CNVs in the presence of systematic*  
450 *genotyping errors*

451 In Fig. 3A we show a case arising within the GABI population, constructed based on the M\* marker  
452 PZE-104096422. The patterns of the profiles resemble those of a 2:1 CNV except that the "BHB"

453 profile is replaced by a similar one labeled "B-B" where the "-" means the call of the M\* marker is  
454 "missing data". We denote this case A/B\_A/-|Hm to indicate that "H" calls were erroneously and  
455 systematically turned into missing data. Because this situation happens many times in the GABI  
456 population, we investigated a few cases in detail by examining the fluorescence data, the calls and the  
457 cluster file used with the Illumina array data. Given the two clouds of points produced from the  
458 fluorescence data for the cases of A and B calls, we find that the "-" calls typically correspond to a  
459 region that lies between those two clouds. Thus it is plausible that these cases, called as "-", are in fact  
460 H, the discrepancy being due to a miscalibration of the cluster file. Based on this observation, we  
461 implemented in our code a procedure whereby the peaks of missing data detected in the allele  
462 frequency profiles could be interpreted as being due to such a "rule" according to which some  
463 proportion or even all of the H calls of M\* become transformed into "-" calls (see details in  
464 Supplementary File S5). If only a fraction becomes transformed, both the BHB and B-B profiles  
465 provide a peak but if all H calls are transformed into "-" calls as seems to be the case in Fig. 3A, then  
466 the BHB curve will be absent. This reconsideration of the data in effect introduces a way to overcome  
467 the technical problem of inadequate cluster files that we observed to arise in the GABI population data.  
468 We also implemented the possibility of applying that transformation rule on *simulated* data, dependent  
469 on the probability of transforming an H call into a "-" call. That probability was estimated from the  
470 data. The resulting simulated profiles based on the inference of a 2:1 CNV in Fig. 3A are displayed in  
471 Fig. 3B, showing an excellent agreement between theory and experiment. Furthermore, this new class  
472 of events leads us to define a signature to be "strong" if each locus that is inferred to be involved in a  
473 CNV is identified by at least one peak from a 3-marker genotypic class without missing data, i.e.,  
474 AAA, AHA, BBB or BHB. As seen in Figs. 3A and 3B, the locus carrying the putative duplication is

475 identified by a peak for B-B but also by a peak for BBB and thus this event is associated with a strong  
476 signature. Clearly, all of the events illustrated in the previous sections correspond to strong signatures.  
477 We now move on to a more complex case where the second locus contains peaks but only for missing  
478 data and thus corresponds to a *weak* signature. As motivation for this more complex case, note that a  
479 miscalibration of the cluster file may be sufficiently severe that the H genotypes are called not only as  
480 "-" but also as either A or B. If that is the case, the peak in the previous case arising for the BBB 3-  
481 marker genotypic class no longer reaches the allele frequency zero at the second locus because some of  
482 the individuals contributing to the BBB class correspond in fact to BHBs. The result of these miscalls is  
483 the increase of the BBB frequency up from zero and thus the more or less disappearance of the BBB  
484 peak. Although the second locus of the CNV can be localized by the B-B curve, it is no longer detected  
485 via the BBB curve and this can raise some doubts as to the veracity of a 1:2 or 2:1 CNV interpretation.  
486 In Fig. 3C we show such a case, produced from the GABI data set for the candidate marker PZE-  
487 104127025. Because we have implemented the rule of transforming H calls into both "-" and "B" calls,  
488 the software detects this event and classifies it as a 2:1 CNV, denoted as A/B\_A/-|HmHb to reflect the  
489 fact that "H" calls were erroneously systematically turned into either missing data or "B" calls. For  
490 these types of events also, our software provides a simulation of what should be expected under the  
491 corresponding hypothesis, estimating from the data the error rates turning H calls into "-" or into B;  
492 Fig. 3D shows the corresponding result, from which one may conclude that probably the weak signal in  
493 Fig. 3C is indeed indicative of a A/B\_A/-|HmHb event.

494

495

496 *Analyses of all events across all 3 mapping populations*

497 We now move on and summarize what comes out of the analyses of each population when considering  
498 all of the corresponding candidate markers. Some characteristics of these populations, in particular  
499 their size and number of markers, are given in TABLE 1.

500

501 **TABLE 1. Results of automatic CNV detection in three different mapping populations**

| Population name                      | GABI  | IBM   | WHEAT |
|--------------------------------------|-------|-------|-------|
| Population type                      | DH    | IRIL  | RIL   |
| Individuals                          | 625   | 239   | 406   |
| Total markers                        | 13160 | 20913 | 83721 |
| Candidate markers                    | 746   | 938   | 10754 |
| Single loci                          | 489   | 515   | 2807  |
| 1:2 or 2:1 CNVs (strong signature)   | 77    | 35    | 47    |
| 1:2 or 2:1 CNVs (weak signature)     | 42    | 115   | 278   |
| Estimated true total 1:2 or 2:1 CNVs | 102   | 56    | 47    |
| 3-locus events (strong signature)    | 5     | 1     | 50    |

502 DH: doubled haploids, RIL: recombinant inbred lines, IRIL: intermated recombinant inbred lines. Candidate markers are  
503 identified by their higher rate of Heterozygous or Missing Data calls. Signatures involving for each locus at least one peak  
504 from a curve based on non-missing data ("AAA", "AHA", "BBB", or "BHB") are named "strong", otherwise the signatures  
505 are considered "weak". Estimation of the number of "true" events was based on visual examination of the candidates for  
506 which the software produced allele frequency profiles, leading to our calling the events either true or false positives. Three-  
507 locus events correspond to situations where three distinct genomic regions show peaks of allele frequency profiles for  
508 classes of individuals, indicating three copies of a region targeted by the candidate marker. Such three-locus events were  
509 analyzed based on strong signatures only. "Single loci" correspond to candidate markers for which only the reference locus  
510 shows allele frequency peaks, with no other peaks elsewhere in the genome.

511



512 *The GABI DH population*

513 This population is very large (625 individuals, *cf.* TABLE 1) and there is no issue of residual  
514 heterozygosity coming from incomplete fixation because of the genome doubling. Given the thresholds  
515 used to classify the markers into the classes Candidate, Mendelian and "Other" (*cf.* Supplementary  
516 Table S1), we obtain 746 candidate markers (out of the total 13160). The software automatically  
517 analyzes the profiles associated with these markers to identify peaks and corresponding loci. Of these  
518 markers, 489 (a wide majority) lead to profiles involving a single locus (TABLE 1). In effect, these  
519 markers were assigned to the class Candidate because of technical problems with the genotyping,  
520 producing too many H or "-" calls, presumably because of some issues with the cluster file calibration  
521 rather than a presence of CNVs. One such case arises for marker SYN12874; it is presented in  
522 Supplementary Figure S3A and detected as "single locus" by our software. However, the remaining  
523 candidate markers lead to profiles having at least two loci (see TABLE 1).

524 About half of such multilocus cases are identified by the software as being proper 1:2 or 2:1 CNVs but  
525 their signatures are split between strong and weak. Visual examination of these profiles allowed us to  
526 validate or not these events, leading to an estimate of a total of 102 true 1:2 or 2:1 CNVs in this data set  
527 (*cf.* TABLE 1); 17 events were not validated by this visual inspection (putative false positives),  
528 corresponding to 16 with weak signatures and only one with a strong signature ( Supplementary  
529 Table S2). Furthermore, in TABLE 2 we give the number of 1:2 or 2:1 CNVs found for each of the 4  
530 possible cases, A/B<sub>-</sub>/A, A/B<sub>A</sub>/-, A/B<sub>-</sub>/B and A/B<sub>B</sub>/-. In a duplication-divergence scenario, one  
531 could hypothesize that a distant ancestor of one of the individuals formed an additional copy that  
532 subsequently diverged by mutation at a single base (Ohno 1970; Lynch and Conery 2000). In such a  
533 scenario, one might naively expect enrichments of A/B<sub>A</sub>/- and A/B<sub>-</sub>/B over the other two classes.

534 However, in view of the numbers in TABLE 2, there is no such enrichment as all four classes have  
535 occurrence numbers of similar magnitude, a point that will be justified in the discussion. It is possible  
536 to further analyze the 1:2 or 2:1 CNVs by considering the separation into strong and weak signatures.  
537 Supplementary Table S1 gives the numbers for all types of automatically detected events. As indicated  
538 in Supplementary Table S2, many events with weak signatures are *not* validated by our visual  
539 inspection, so it is best to concentrate on the events providing strong signatures.

540 Of the other multilocus events, only 5 have a strong signature involving three or more loci (*cf.*  
541 TABLE 1). These 5 events belong to just a few of the different types with respect to allelic content as  
542 shown in TABLE 2; although it may be tempting to argue for an enrichment of the A/B<sub>-</sub>/B<sub>-</sub>/B type,  
543 the numbers are very small so it is not useful to go into such speculations.

544 Lastly, the software identifies 131 events in which there are multiple loci but with patterns of profiles  
545 that are "unknown" because they differ from those produced by CNVs in the list provided in  
546 Supplementary Table S1. Might some of these cases reveal true CNVs that are novel compared to what  
547 we considered so far? To get some insight into that possibility, we examined the corresponding profiles.  
548 Some cases provide no compelling evidence for a CNV, the profiles are simply very noisy and peaks  
549 may be presumed to be non-significant. For other cases, as in Supplementary Figures S3B and S3C,  
550 there is clearly an additional locus but the profiles are not as expected from our list of standard 1:2 or  
551 2:1 CNVs. We also find cases of more than one additional locus as in Supplementary Figures S3D and  
552 S3E, where again the signature is not compatible with any of our standard 3 locus events or extensions.

553 *The IBM IRIL population*

554 Similar statistics for the IBM RIL population are given in TABLE 1 and TABLE 2, and in  
555 Supplementary Tables S1 and S2 and differ mainly quantitatively when compared to the GABI  
556 population. Nevertheless, from the conceptual point of view, the main new feature when going from  
557 GABI to IBM is the presence of residual heterozygosity in Mendelian markers. Indeed, since IBM is an  
558 intermated RIL population, fixation can be incomplete because either not enough generations of selfing  
559 have been applied or because there is a selective force impeding the homozygous state, situations that  
560 do not occur with doubled haploids. But once appropriate thresholds are set for the minimum number  
561 of heterozygote calls to select a marker as a candidate, our method was also efficient to discover CNVs  
562 in that population. As with the GABI population, the rate of true over false positives was extremely  
563 high (100% here, see Supplementary Table S2) when considering events with strong signatures. On the  
564 other hand, events with weak signatures gave a higher proportion of false positives in IBM as  
565 compared to GABI. Finally, there was only a single event associated with three loci. It should be noted  
566 that both IBM and GABI populations were genotyped with the same Illumina Maize SNP50 array, and  
567 deal with the same species, which is consistent with the qualitatively similar results obtained.

#### 568 *The WHEAT RIL population and importance of homeologues*

569 The case of the WHEAT population is *a priori* quite different from the two first populations because  
570 bread wheat is hexaploid and also because the population was genotyped with a different SNP array.  
571 Not so surprisingly, we observed quite different results (see TABLE 1 and TABLE 2, and  
572 Supplementary Tables S1 and S2). This population is quite large (406 individuals, *cf.* TABLE 1) and it  
573 has far more markers (83721) than the other populations, justifying that the number of candidate  
574 markers, 10754, is also much higher (see Supplementary Table S1 for the thresholds used to define  
575 Candidate and Mendelian markers). In contrast to the other populations, the great majority of these

576 candidates do *not* give rise to any profile, even the single-locus one, which is indicative of potential  
577 mapping problems. Nevertheless, a fair fraction of the candidates does give profiles. A large number of  
578 these, 2807 specifically, are identified as having just the reference locus and thus are not of interest.  
579 Such quite frequent cases are expected in WHEAT as in IBM because residual heterozygosity produces  
580 false candidates.

581 Of the remaining candidates, some are identified by the software as associated with 2 or more loci. For  
582 the events detected as being of the 1:2 or 2:1 CNV type, 47 have a strong signature and 278 have a  
583 weak signature. Validation by inspecting all of these events suggests that only the strong signatures  
584 provide true positives. In TABLE 2 we give the number of 1:2 or 2:1 CNVs found for each of the 4  
585 types, A/B\_-/A, A/B\_A/-, A/B\_-/B, and A/B\_B/-. Though these classes are less balanced than in the  
586 GABI population, the evidence for enrichment of particular classes is not very strong. Supplementary  
587 Table S1 gives the numbers for all types (including thus the rules to take into account genotyping  
588 errors) of automatically detected events. However, as indicated in Supplementary Table S2 and  
589 previously mentioned, the events with weak signatures are not validated by our visual inspection, so it  
590 is best to focus on the events with strong signatures only.

591 This brings us to the strong signatures for events involving three or more loci (*cf.* TABLE 1). The types  
592 of these events are given in TABLE 2. Clearly the main types seen have one allele in three copies and  
593 the other in a single copy. It is relevant here to recall that wheat is a hexaploid which contains three  
594 genomes (A, B, and D) with seven chromosomes each. We found 20 cases where the three copies are  
595 located on three homeologous chromosomes (e.g. in Supplementary Figures S2C and S2E on  
596 chromosomes 2 and 6), 8 cases with two copies on two homeologous chromosomes and the third one  
597 on a different (non-homeologous) chromosome (e.g., in Supplementary Figures S2A and S2I), and

598 finally 22 cases where the three loci are on three non-homeologous chromosomes (e.g., in  
 599 Supplementary Figure S2G). Although enrichment amongst homeologues is expected, it is appealing to  
 600 have it come out from our automatized software.

601

602 **TABLE 2. Number of each type of event found in three segregating populations.**

| Population name | GABI | IBM | WHEAT |
|-----------------|------|-----|-------|
| A/B_-/A         | 21   | 0   | 3     |
| A/B_A/-         | 17   | 13  | 12    |
| A/B_-/B         | 18   | 22  | 15    |
| A/B_B/-         | 20   | 0   | 17    |
| A/B_-/A_-/A     | 0    | 0   | 5     |
| A/B_A/-_A/-     | 0    | 0   | 1     |
| A/B_-/B_-/B     | 3    | 1   | 0     |
| A/B_B/-_B/-     | 0    | 0   | 9     |
| A/B_-/A_A/-     | 0    | 0   | 0     |
| A/B_A/-_-/A     | 1    | 0   | 16    |
| A/B_-/A_-/B     | 0    | 0   | 0     |
| A/B_-/B_-/A     | 1    | 0   | 0     |
| A/B_-/A_B/-     | 0    | 0   | 0     |
| A/B_B/-_-/A     | 0    | 0   | 0     |
| A/B_A/-_-/B     | 0    | 0   | 0     |
| A/B_-/B_A/-     | 0    | 0   | 0     |
| A/B_A/-_B/-     | 0    | 0   | 0     |
| A/B_B/-_A/-     | 0    | 0   | 0     |
| A/B_-/B_B/-     | 0    | 0   | 0     |
| A/B_B/-_-/B     | 0    | 0   | 19    |

603 Number of events found for each category of 1:2 or 2:1 CNVs (upper part) or 3-locus events (lower part) in two Maize  
 604 populations (GABI and IBM), and one wheat population (WHEAT). Every event was automatically detected by the  
 605 software, and also visually checked by looking at the corresponding allele frequency profiles. Each category is encoded as a  
 606 string of 2 to 3 groups of 3 characters each, separated by an underscore. The first group is always encoded "A/B" and  
 607 indicates the reference locus, located at the position where the candidate marker was initially mapped. Further groups  
 608 indicate other copies of the region targeted by the candidate marker. For all groups (loci), the letters just before and just after  
 609 the slash represent respectively the haplotypes of the first parent (alleles denoted "A"), and of the second parent (alleles  
 610 denoted "B").

611

612 *Sequence-based validation of candidates with strong but not weak signatures for IBM*

613 CNVmap provides candidate CNVs and predictions for the associated loci. In the case of the IBM  
614 population, the parental genomes are fully assembled and so our predictions can be checked by  
615 searching in those reference genomes for multiple occurrences of the specific sequences flanking the  
616 candidate SNPs *via* BLAST (see Methods for details). The results of those analyses are as follows.  
617 First, concerning events having strong signatures, the majority of the predictions are validated.  
618 Specifically, of the 13 predicted 2:1 CNVs (A/B\_A/- or A/B\_B/-; two copies in parent B73), all are  
619 validated, while of the 22 predicted 1:2 CNVs (A/B\_-/A or A/B\_-/B; two copies in parent Mo17), 12  
620 are validated (Fig. 4). Not surprisingly, when testing the hypothesis  $H_0$  of no CNV in these strong  
621 signature events, all but one of the  $p$ -values (for events validated or non-validated by BLAST) were  
622 below 0.05 and most of them were below  $10^{-3}$  (Fig. 4, see Materials and Methods for the calculation of  
623 these  $p$ -values). Second, concerning events having weak signatures, essentially none of them are  
624 validated; furthermore, Fig. 4 shows a broad distribution of  $p$ -values, calling in doubt the credibility of  
625 these weak candidate CNVs.

626

627 **Discussion**

628 *An original method based on linkage to detect and genetically map CNVs*

629 We presented a new method for revealing and genetically mapping copy number variations in bi-  
630 parental segregating populations made of homozygous individuals. The heart of the method is the fact  
631 that a marker participating to a CNV will lead to an excess of heterozygotes in the segregating

632 population with associated signatures in genome-wide allele frequency profiles. We validated this  
633 method with maize doubled-haploid lines, maize intermated recombinant inbred lines, and wheat  
634 recombinant inbred lines, revealing CNVs even in these last two types of populations in spite of the  
635 presence of their residual heterozygosity. The approach does not involve any *a priori* knowledge about  
636 the type or location of the events, rather it is based on signatures in genome-wide allele frequency  
637 profiles, assuming that the individuals therein have been genotyped. Such genotyping might have been  
638 done for instance for detecting QTLs or for breeding purposes (as in genomic selection), and thus our  
639 approach can "piggy-back" *for free* after the production of such genetic material. In this context, our  
640 detection of CNV loci has a spatial resolution that depends on the local recombination rate, so the  
641 larger the population and the larger the recombination rate the better. Nevertheless, detecting the  
642 *existence* of duplicated loci and finding their approximate localization is relatively easy: 239  
643 individuals are sufficient for the RILs (F6) we studied, and lower numbers can also give good results.  
644 The major limitation of our approach is that the duplicated loci cannot be too close to the original  
645 locus, and thus we cannot easily detect tandem duplications. Another requirement of course is that the  
646 markers be robustly ordered, so the quality of the genetic map is important. In usual genotyping arrays,  
647 SNPs have been included only if they were found to be exploitable on a reference panel, and thus SNPs  
648 with heterozygous signals have little chance of having been kept for inclusion on that array. As a result,  
649 we certainly strongly underestimate the real number of CNVs. Consequently, our approach, when used  
650 on data produced with SNP arrays, should not be considered as a way of surveying the *number* of  
651 structural variation events between two parents, but rather as a cost-free means of getting, for a subset  
652 of such events, detailed information on their nature and in particular the genomic locations of the  
653 associated copies.

654 *Different rate of success of sequence-based validations in B73 and Mo17 parents*

655 In the IBM population, all 2:1 CNV events (with two copies in parent B73) were confirmed by BLAST  
656 analysis, whereas only 55% of 1:2 CNVs (with two copies in parent Mo17) led to successful validation.  
657 This difference may be due to a less good quality of the genome assembly of Mo17. Indeed, the quality  
658 of B73 assembly is most probably higher because that inbred line was chosen for the first Maize  
659 reference genome sequence, so more sequencing and assembly effort was dedicated to this line.  
660 Another explanation may be that the level of sequence divergence between B73 and Mo17 leads some  
661 loci to escape our BLAST search on Mo17 because the oligonucleotides used in the MaizeSNP50  
662 Illumina array were designed based on the B73 reference sequence, but nevertheless the markers would  
663 still be able to hybridize on Mo17 DNA.

664 *Applicability to non-fixed populations*

665 Our method is primarily based on the detection of apparent heterozygosity, so the presence of  
666 heterozygous loci due to incomplete fixation, as occurs in RIL populations, is expected to greatly lower  
667 the efficiency of detection. So we adapted the criterion for a marker to be a non-Mendelian candidate  
668 by enforcing its level of heterozygosity to be higher than a given threshold, thereby limiting the number  
669 of candidate markers to analyze. And in fact, the method proved to be sufficiently powerful to detect  
670 CNVs in recombinant inbred line populations corresponding to six generations of selfing.

671 *Detecting CNVs in the presence of systematic genotyping errors*

672 We also found clear signatures of CNVs based on missing data. Typically, such missing data arise from  
673 technical systematic biases in the genotyping (e.g. systematic mis-calling of heterozygotes as missing  
674 data and/or as homozygotes), and thus can be put on a similar footing with the more standard signatures



675 of CNVs such as A/B\_B/-. Thus, in addition to being able to detect non-Mendelian SNPs in a  
676 genotyping array (in linkage analyses like QTL mapping, it is useful to remove them), our method is  
677 also able to reveal some flaws in the cluster files used for analyzing Illumina array data. Such cluster  
678 files, which determine the way fluorescence levels at two different wavelengths are converted into a  
679 genotype call, may be more or less appropriate depending on the genetic origin of the material being  
680 genotyped, or may be sensitive to some variations of the experimental conditions during the  
681 hybridization of the arrays. In our results, we could clearly demonstrate that a large number of markers  
682 suffered from such systematic genotyping errors transforming heterozygote calls into missing data and/  
683 or into homozygotes.

684 *Most detected events correspond to four types of parent-specific duplications*

685 For the two maize datasets studied, the vast majority of the events involve just two loci. Furthermore,  
686 most of these can be identified as parent-specific duplications, corresponding to the four types  
687 A/B\_A/-, A/B\_-/A, A/B\_B/-, or A/B\_-/B. Among them, A/B\_A/- and A/B\_-/B involve haplotypes with  
688 two copies of the same allele in the parent carrying the duplication. On the other hand, A/B\_-/A and A/  
689 B\_B/- involve two different alleles at the additional locus in the haplotype of the parent carrying the  
690 duplication, so that parent -- although it is an inbred line supposed to be almost fully homozygous -- is  
691 expected to be genotyped as heterozygous for marker M\*. We thus analyzed genotyping data obtained  
692 from the parents, and indeed, in all such cases, we observed heterozygous calls in the genotype data  
693 associated with the corresponding parent of the GABI population. From an evolutionary point of view,  
694 the latter situations (A/B\_-/A and A/B\_B/-) might seem to suggest a temporal order, namely a  
695 duplication followed by a divergence at the reference locus. However, it is just as likely that the  
696 divergence happened first and the duplication later: since the two loci are not tightly linked,

697 recombination between them can very well produce the A/B\_B/- haplotype starting with the A/B\_-/B  
698 haplotype. Thus there is no *a priori* expectation that two of the four types of 1:2 or 2:1 CNV should be  
699 much rarer than the other two types, and this is in line with what comes out of the summary statistics as  
700 can be seen in TABLE 2 for GABI and WHEAT populations. However, in IBM, all 1:2 or 2:1 CNVs  
701 detected had the same allele on both copies for a given haplotype, which suggests that SNPs in the IBM  
702 mapping data set may have been selected to remove markers with heterozygous calls on the parents.

### 703 *The special case of wheat homeologous chromosomes*

704 In the case of wheat which is a hexaploid species containing three diploid genomes, one has the further  
705 issue of homeologous chromosomes. Because these chromosomes have diverged from a common  
706 ancestor, the gene content is quite well conserved and chromosomes display good collinearity with  
707 limited rearrangements (Consortium (IWGSC) *et al.* 2018). A consequence of this is that SNPs may not  
708 necessarily be genome-specific and may therefore hybridize on two or three homeologous loci  
709 (Rimbert *et al.* 2018). Such similar sequences may generate signals of CNVs in the allelic profiles and  
710 so we asked the question of whether the duplicated loci we found in wheat were more often than  
711 expected on the homeolog. The analysis of the two- and three-locus events in our WHEAT dataset in  
712 fact shows a huge enrichment for favoring the homeologous chromosomes. Our method can thus  
713 provide a useful way to assess the level of genome-specificity of the SNPs of a given genotyping array,  
714 and help validating the selection of subsets of purely Mendelian markers.

### 715 *Only a tiny minority of the allelic profiles involve three or more loci in the maize populations*

716 Because of the hexaploid nature of wheat, this plant was expected to reveal many triplication events if  
717 markers were not perfectly genome-specific, and this is actually what we found. On the other hand, in  
718 maize the ancient allotetraploid origin of the species is old enough for most markers to behave as

719 single-copy, so one may expect far fewer three-locus events. And indeed, as can be seen from  
720 TABLE 2, there are some candidate markers that generate profiles with three loci but they are quite rare  
721 and arise mostly within the GABI population. This difference may be due to the GABI population  
722 being much larger, allowing our method to be more powerful on that data.

### 723 *Possible evolutionary scenarios for triplications*

724 Some entangled events such as A/B\_B/\_-/B may seem unexpected because they involve the allele  
725 from the opposite parent. However, just as we explained for the two-locus case, recombination can  
726 scramble the assignment of alleles and so a posteriori such events are not surprising. But there is  
727 another possibility for justifying such an entangled CNV without appealing to recombination. Indeed,  
728 imagine that an ancestral triplication arose so that the allele B was present at all three loci. Parent 1 and  
729 Parent 2 may be identical by descent for that triplication for all of their homologues. If so, today's  
730 situation can very well be due to subsequent divergence only: the divergence at the reference locus  
731 would produce a SNP while the divergence at the other two loci would be more severe, for instance  
732 corresponding to a deletion or appearance of other SNPs in the flanking sequences of the two other  
733 loci, thereby preventing the hybridization of oligonucleotides. Clearly such a scenario can also be  
734 responsible for entangled 1:2 or 2:1 CNVs.

### 735 *Conclusion*

736 We developed an original *linkage-based* method to detect CNVs and genetically map the associated  
737 previously unknown copies from genotype data of segregating populations. Our software based on this  
738 method makes it possible to perform fully automatic mining of segregation data to extract a list of high  
739 confidence CNVs, including the detailed type of event and the genomic location(s) of the initially  
740 unknown locus or loci. It is thus a costless and easy way to generate additional added value from

741 genotyping efforts initially dedicated to genetic map construction or QTL analyses. Because of its ease  
742 of use, our tool for detecting CNVs could be applied to other kinds of populations. First, going from bi-  
743 parental to multi-parental RILs as used in MAGIC (Dell'Acqua *et al.* 2015) or NAM (McMullen *et al.*  
744 2009) populations should be straightforward, our computer program can be used as such for all biallelic  
745 SNPs. Second, it seems possible that CNVs could be detected by our approach when using the kinds of  
746 panels exploited in GWAS when the individuals in the panel are homozygous (e.g. inbred lines); the  
747 method would then correspond to searching genome-wide for associations between allele frequency  
748 and the particular 3-loci genotype (e.g., AHA) detected at a reference locus (that is for the non-  
749 Mendelian marker of interest and its two flanking markers). Such an approach, using a diversified  
750 panel, might in fact allow one to identify duplicated loci with a high level of resolution.

751

752

### 753 **Declarations**

754 *Ethics approval and consent to participate:* 'Not applicable'

755 *Consent for publication:* 'Not applicable'

756 *Competing interests:*

757 The authors declare that they have no competing interests

758 *Funding:*

759 The research leading to these results has received funding from the French Government managed by  
760 the Research National Agency (ANR) under the "Investment for the Future" programs BreedWheat and  
761 Amaizing (project ANR-10-BTBR-03), from FranceAgriMer, French Funds to support Plant Breeding  
762 (FSOV) and from INRA. This work has benefited from a French State grant (LabEx Saclay Plant  
763 Sciences-SPS, ANR-10-LABX-0040-SPS), managed by the French National Research Agency under  
764 an "Investments for the Future" program (ANR-11-IDEX-0003-02) which funded the salary of KJ.

765 *Authors' contributions:*

766 MF and OM conceived the method, developed the computer programs, analyzed and interpreted the  
767 results, and wrote the final manuscript. MF, KJ and OM worked on the computer program, performed  
768 analyzes on the data sets, and produced the first draft. EP, CK, and SM provided data sets. All authors  
769 read, edited and approved the manuscript.

770 *Acknowledgements*

771 The authors are grateful to two anonymous reviewers for their comments which helped us to improve  
772 both the software and the manuscript. We also thank E. Bauer for fruitful discussions about the method,  
773 C. Schön, T. Mary-Huard and S. Nicolas for comments and advice, and to the CNV4Sel group for  
774 feedback during the development of our computational tool.

775

776 **References**

- Alkan C., J. M. Kidd, T. Marques-Bonet, G. Aksay, F. Antonacci, *et al.*, 2009 Personalized copy number and segmental duplication maps using next-generation sequencing. *Nature Genetics* 41: 1061–1067. <https://doi.org/10.1038/ng.437>
- Alkan C., B. P. Coe, and E. E. Eichler, 2011 Genome structural variation discovery and genotyping. *Nature Reviews Genetics* 12: 363–376. <https://doi.org/10.1038/nrg2958>
- Bailey J. A., Z. Gu, R. A. Clark, K. Reinert, R. V. Samonte, *et al.*, 2002 Recent Segmental Duplications in the Human Genome. *Science* 297: 1003–1007. <https://doi.org/10.1126/science.1072047>
- Beckmann J. S., X. Estivill, and S. E. Antonarakis, 2007 Copy number variants and genetic traits: closer to the resolution of phenotypic to genotypic variability. *Nature Reviews Genetics* 8: 639–646. <https://doi.org/10.1038/nrg2149>
- Beló A., M. K. Beatty, D. Hondred, K. A. Fengler, B. Li, *et al.*, 2009 Allelic genome structural variations in maize detected by array comparative genome hybridization. *Theor Appl Genet* 120: 355–367. <https://doi.org/10.1007/s00122-009-1128-9>
- Chaisson M. J., D. Brinza, and P. A. Pevzner, 2009 De novo fragment assembly with short mate-paired reads: Does the read length matter? *Genome Res.* 19: 336–346. <https://doi.org/10.1101/gr.079053.108>
- Chen K., J. W. Wallis, M. D. McLellan, D. E. Larson, J. M. Kalicki, *et al.*, 2009 BreakDancer: an algorithm for high-resolution mapping of genomic structural variation. *Nature Methods* 6: 677–681. <https://doi.org/10.1038/nmeth.1363>

- Choulet F., A. Alberti, S. Theil, N. Glover, V. Barbe, *et al.*, 2014 Structural and functional partitioning of bread wheat chromosome 3B. *Science* 345: 1249721.  
<https://doi.org/10.1126/science.1249721>
- Colella S., C. Yau, J. M. Taylor, G. Mirza, H. Butler, *et al.*, 2007 QuantiSNP: an Objective Bayes Hidden-Markov Model to detect and accurately map copy number variation using SNP genotyping data. *Nucleic Acids Res* 35: 2013–2025. <https://doi.org/10.1093/nar/gkm076>
- Conrad D. F., D. Pinto, R. Redon, L. Feuk, O. Gokcumen, *et al.*, 2010 Origins and functional impact of copy number variation in the human genome. *Nature* 464: 704–712.  
<https://doi.org/10.1038/nature08516>
- Consortium (IWGSC) T. I. W. G. S., R. Appels, K. Eversole, N. Stein, C. Feuillet, *et al.*, 2018 Shifting the limits in wheat research and breeding using a fully annotated reference genome. *Science* 361: eaar7191. <https://doi.org/10.1126/science.aar7191>
- Cooper G. M., T. Zerr, J. M. Kidd, E. E. Eichler, and D. A. Nickerson, 2008 Systematic assessment of copy number variant detection via genome-wide SNP genotyping. *Nat Genet* 40: 1199–1203.  
<https://doi.org/10.1038/ng.236>
- Dell’Acqua M., D. M. Gatti, G. Pea, F. Cattonaro, F. Coppens, *et al.*, 2015 Genetic properties of the MAGIC maize population: a new platform for high definition QTL mapping in *Zea mays*. *Genome Biology* 16: 167. <https://doi.org/10.1186/s13059-015-0716-z>
- Falque M., L. K. Anderson, S. M. Stack, F. Gauthier, and O. C. Martin, 2009 Two Types of Meiotic Crossovers Coexist in Maize. *The Plant Cell* 21: 3915–3925.  
<https://doi.org/10.1105/tpc.109.071514>

- Ganal M. W., G. Durstewitz, A. Polley, A. Bérard, E. S. Buckler, *et al.*, 2011 A Large Maize (*Zea mays* L.) SNP Genotyping Array: Development and Germplasm Genotyping, and Genetic Mapping to Compare with the B73 Reference Genome, (L. Lukens, Ed.). PLoS ONE 6: e28334.  
<https://doi.org/10.1371/journal.pone.0028334>
- Givry S. de, M. Bouchez, P. Chabrier, D. Milan, and T. Schiex, 2004 CarthaGene: multipopulation integrated genetic and radiation hybrid mapping. *Bioinformatics* 21: 1703–1704. <https://doi.org/10.1093/bioinformatics/bti222>
- Guryev V., K. Saar, T. Adamovic, M. Verheul, S. A. A. C. van Heesch, *et al.*, 2008 Distribution and functional impact of DNA copy number variation in the rat. *Nature Genetics* 40: 538–545.  
<https://doi.org/10.1038/ng.141>
- Lee M., N. Sharopova, W. D. Beavis, D. Grant, M. Katt, *et al.*, 2002 Expanding the genetic map of maize with the intermated B73 x Mo17 (IBM) population. *Plant molecular biology* 48: 453–61.
- Li R., H. Zhu, J. Ruan, W. Qian, X. Fang, *et al.*, 2010 De novo assembly of human genomes with massively parallel short read sequencing. *Genome Res.* 20: 265–272.  
<https://doi.org/10.1101/gr.097261.109>
- Lynch M., and J. S. Conery, 2000 The Evolutionary Fate and Consequences of Duplicate Genes. *Science* 290: 1151–1155. <https://doi.org/10.1126/science.290.5494.1151>
- McMullen M. D., S. Kresovich, H. S. Villeda, P. Bradbury, H. Li, *et al.*, 2009 Genetic Properties of the Maize Nested Association Mapping Population. *Science* 325: 737–740.  
<https://doi.org/10.1126/science.1174320>
- McPeck M. S., and T. P. Speed, 1995 Modeling Interference in Genetic Recombination. *Genetics* 139: 1031–1044.



- Mills R. E., C. T. Luttig, C. E. Larkins, A. Beauchamp, C. Tsui, *et al.*, 2006 An initial map of insertion and deletion (INDEL) variation in the human genome. *Genome Res.* 16: 1182–1190.  
<https://doi.org/10.1101/gr.4565806>
- Ohno S., 1970 *Evolution by Gene Duplication*. Springer Science & Business Media.
- Pang A. W., J. R. MacDonald, D. Pinto, J. Wei, M. A. Rafiq, *et al.*, 2010 Towards a comprehensive structural variation map of an individual human genome. *Genome Biology* 11: R52.  
<https://doi.org/10.1186/gb-2010-11-5-r52>
- Presterl T., M. Ouzunova, W. Schmidt, E. M. Möller, F. K. Röber, *et al.*, 2007 Quantitative trait loci for early plant vigour of maize grown in chilly environments. *Theor Appl Genet* 114: 1059–1070.  
<https://doi.org/10.1007/s00122-006-0499-4>
- Redon R., S. Ishikawa, K. R. Fitch, L. Feuk, G. H. Perry, *et al.*, 2006 Global variation in copy number in the human genome. *Nature* 444: 444–454. <https://doi.org/10.1038/nature05329>
- Rimbert H., B. Darrier, J. Navarro, J. Kitt, F. Choulet, *et al.*, 2018 High throughput SNP discovery and genotyping in hexaploid wheat. *PLOS ONE* 13: e0186329.  
<https://doi.org/10.1371/journal.pone.0186329>
- Simpson J. T., K. Wong, S. D. Jackman, J. E. Schein, S. J. M. Jones, *et al.*, 2009 ABySS: A parallel assembler for short read sequence data. *Genome Res.* 19: 1117–1123.  
<https://doi.org/10.1101/gr.089532.108>
- Springer N. M., K. Ying, Y. Fu, T. Ji, C.-T. Yeh, *et al.*, 2009 Maize Inbreds Exhibit High Levels of Copy Number Variation (CNV) and Presence/Absence Variation (PAV) in Genome Content. *PLOS Genetics* 5: e1000734. <https://doi.org/10.1371/journal.pgen.1000734>

- Sudmant P. H., J. O. Kitzman, F. Antonacci, C. Alkan, M. Malig, *et al.*, 2010 Diversity of Human Copy Number Variation and Multicopy Genes. *Science* 330: 641–646.  
<https://doi.org/10.1126/science.1197005>
- Wu Y., P. R. Bhat, T. J. Close, and S. Lonardi, 2008 Efficient and Accurate Construction of Genetic Linkage Maps from the Minimum Spanning Tree of a Graph, (L. Kruglyak, Ed.). *PLoS Genetics* 4: e1000212. <https://doi.org/10.1371/journal.pgen.1000212>
- Ye K., M. H. Schulz, Q. Long, R. Apweiler, and Z. Ning, 2009 Pindel: a pattern growth approach to detect break points of large deletions and medium sized insertions from paired-end short reads. *Bioinformatics* 25: 2865–2871. <https://doi.org/10.1093/bioinformatics/btp394>
- Yoon S., Z. Xuan, V. Makarov, K. Ye, and J. Sebat, 2009 Sensitive and accurate detection of copy number variants using read depth of coverage. *Genome Res.* 19: 1586–1592.  
<https://doi.org/10.1101/gr.092981.109>
- Zare F., M. Dow, N. Monteleone, A. Hosny, and S. Nabavi, 2017 An evaluation of copy number variation detection tools for cancer using whole exome sequencing data. *BMC Bioinformatics* 18: 286. <https://doi.org/10.1186/s12859-017-1705-x>
- Zerbino D. R., and E. Birney, 2008 Velvet: Algorithms for de novo short read assembly using de Bruijn graphs. *Genome Res.* 18: 821–829. <https://doi.org/10.1101/gr.074492.107>
- Zhang F., W. Gu, M. E. Hurles, and J. R. Lupski, 2009 Copy Number Variation in Human Health, Disease, and Evolution. *Annual Review of Genomics and Human Genetics* 10: 451–481. <https://doi.org/10.1146/annurev.genom.9.081307.164217>

778

## 779 **Figure legends**

780

### 781 **Figure 1. Consequences of parent-specific locus duplication on allele frequency profiles**

782 A: Duplication in one parent leads to apparent heterozygotes in the gametes for the non-Mendelian  
783 marker  $M^*$ . B: simulated genome-wide allele frequency profiles using subsets of individuals belonging  
784 to the three-markers genotype classes AAA, BBB, or BHB at markers  $M_L$ ,  $M^*$ , and  $M_R$  ( $M_L$  and  $M_R$   
785 being the Mendelian markers flanking  $M^*$ ; see text). Such profiles reveal the loci involved in  
786 duplications. The allele of parent 1 is called "A", the allele of parent 2 is called "B", heterozygotes are  
787 called "H", and missing data are called "-". Each curve shows the frequency of the allele "A" along the  
788 genome (X-axis indicates cumulated genetic positions), when considering different subsets of  
789 individuals of the population as follows: cyan dots and curve for individuals (denoted "BHB")  
790 genotyped "H" at the candidate marker  $M^*$  and "B" on both non-candidate flanking markers  $M_L$  and  
791  $M_R$  indicating the allelic context of the region, and similarly red for "AAA" individuals, dark blue for  
792 "BBB" individuals. Hatched rectangles indicate the estimated confidence intervals on the position of  
793 the detected loci involved in the event. The rectangle is black for the reference locus (see text) and red  
794 for the secondary locus. Dots represent values of individual markers and associated curves show the  
795 result of the smoothing procedure used to detect the peaks. Lastly, the black dashed line indicates the  
796 frequency of "A" allele based on all individuals of the population.

797

### 798 **Figure 2. Examples of signatures of events involving two or three loci**

799 Data are from the Maize doubled-haploid population GABI. Dots and curves have the same meaning as  
800 in Figure 1. Panels A, C, and E show experimental profiles for respectively a 1:2 CNV event with both  
801 copies on different chromosomes, a 2:1 CNV event with both copies on the same chromosome, and a 3-  
802 locus event with copies on three different chromosomes. Panels B, D, and F show simulation results  
803 reproducing the CNV situation inferred from panels A, C, and E respectively (see text). The allele of  
804 parent 1 is called "A", the allele of parent 2 is called "B", heterozygotes are called "H", and missing  
805 data are called "-". Each curve shows the frequency of the allele "A" along the genome (X-axis  
806 indicates cumulated genetic positions), when considering different subsets of individuals of the  
807 population as follows: pink dots and curve for individuals (denoted "AHA") genotyped "H" at the  
808 candidate marker and "A" on both non-candidate flanking markers indicating the allelic context of the  
809 region, and similarly cyan for "BHB" individuals, red for "AAA" individuals, dark blue for "BBB"  
810 individuals. Curves generated by the software for classes based on missing data (light grey for "A-A"  
811 individuals, and black for "B-B" individuals) were hidden here for better clarity of the profiles.  
812 Hatched rectangles indicate the estimated confidence intervals on the position of the detected loci  
813 involved in the event. They are black for the reference locus (see text) and red for the secondary locus  
814 (or red or green for the two secondary loci in the case of the 3-locus event in panels E and F). The  
815 name of the candidate (non-Mendelian) marker considered is given in the header of each panel, as well  
816 as numbers of individuals counted for each three-locus genotype class.

817

818 **Figure 3. Examples of profiles showing characteristic signatures of CNVs in the presence of**  
819 **systematic genotyping errors**

820 Data are from the GABI population. Dots and curves have the same meaning as in Figure 1. Panel A  
821 shows a typical "strong" signature, with a 2:1 CNV event in the case where "H" calls of the candidate  
822 marker were systematically called missing data ("-"). Panel C shows a typical "weak" signature, where  
823 a 2:1 CNV event in the case where "H" calls of the candidate marker were systematically called either  
824 as missing data ("-") or as "B" in non-zero proportions. The software provides estimated systematic  
825 error rates for each such candidate. Panels B and D show simulation results reproducing the CNV  
826 situation inferred from A and C respectively (see text). The allele of parent 1 is called "A", the allele of  
827 parent 2 is called "B", and missing data are called "-". Each curve shows the frequency of the allele "A"  
828 along the genome (X-axis indicates cumulated genetic positions), when considering different subsets of  
829 individuals of the population as follows: pink dots and curve for individuals (denoted "AHA")  
830 genotyped "H" at the candidate marker and "A" on both non-candidate flanking markers indicating the  
831 allelic context of the region, and similarly cyan for "BHB" individuals, red for "AAA" individuals, dark  
832 blue for "BBB" individuals, grey for "A-A" individuals, and black for "B-B" individuals. Hatched  
833 rectangles indicate the estimated confidence intervals on the position of the detected loci involved in  
834 the event. The rectangle is black for the reference locus (see text) and red for the secondary locus. The  
835 name of the candidate (non-Mendelian) marker considered is given in the header of each panel, as well  
836 as numbers of individuals counted for each three-locus genotype class.

837

#### 838 **Figure 4. Validation of CNVs found in the IBM population**

839 All 1:2 and 2:1 CNVs found in the IBM population (obtained from the cross B73xMo17), based on  
840 Strong or Weak signatures, were submitted to two different types of validation (see Materials and  
841 Methods): (1) a *p*-value (Y-axis) was computed using 1000 simulations for the  $H_0$  hypothesis: "the

842 marker M\* is present as a single copy in both B73 and Mo17 parents", and (2) the presence of the  
843 second copy in the reference genome of the expected parent (B73 for 2:1 CNVs and Mo17 for 1:2  
844 CNVs) was checked using BLAST search against whole genome sequence assemblies of both parents.  
845 On X-axis, events are denoted 'Blast-OK' or 'No-Blast' according to the success of the sequence-based  
846 validation, and 'B73 (or Mo17)-Strong (or Weak)' according to the types of events considered (strength  
847 of the signature and B73 or Mo17 having two copies). Numbers below the line Y=0 indicate the  
848 number of events in each category.

849

## 850 **List of Supplementary Material**

851 **Supplementary Table S1.** Detailed statistics of the three populations GABI, IBM, and WHEAT

852 **Supplementary Table S2.** Assessment of rates of true and false positives by visual inspection

853 **Supplementary Figure S1.** Examples of allele frequency profiles showing characteristic signatures of  
854 four different types of 1:2 or 2:1 CNVs.

855 **Supplementary Figure S2.** Examples of allele frequency profiles for each type of three-locus events  
856 found in wheat.

857 **Supplementary Figure S3.** Examples of allele frequency profiles showing different situations where  
858 no CNV was identified by the software.

859 **Supplementary File S1.** CNVmap software as an R package ( CNVmap12.tar.gz archive to open in R  
860 with the function `install.packages()` ).

861 **Supplementary File S2.** Compressed (.zip) archive of GABI data sets to run CNVmap.

862 **Supplementary File S3.** Compressed (.zip) archive of IBM data sets to run CNVmap.

863 **Supplementary File S4.** Compressed (.zip) archive of WHEAT data sets to run CNVmap.

864 **Supplementary File S5.** Supplementary Methods: specification of all CNV signatures recognized by

865 the software CNVmap.

866 **Supplementary File S6.** Installing with Rstudio. Particular procedure for some versions of R/Rstudio.

867

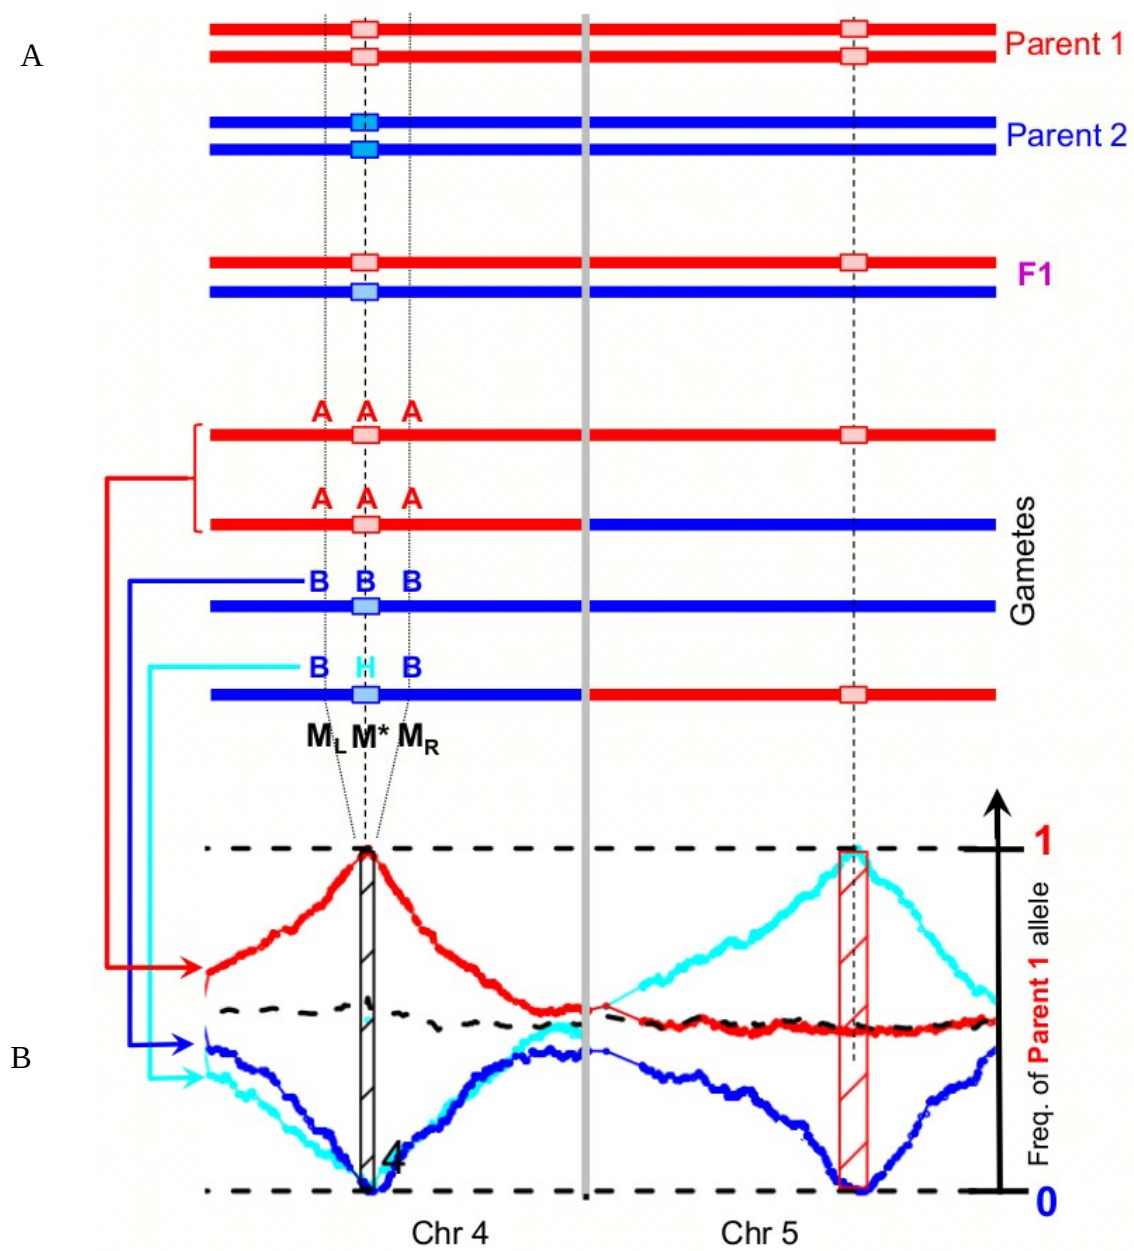

Figure 1.



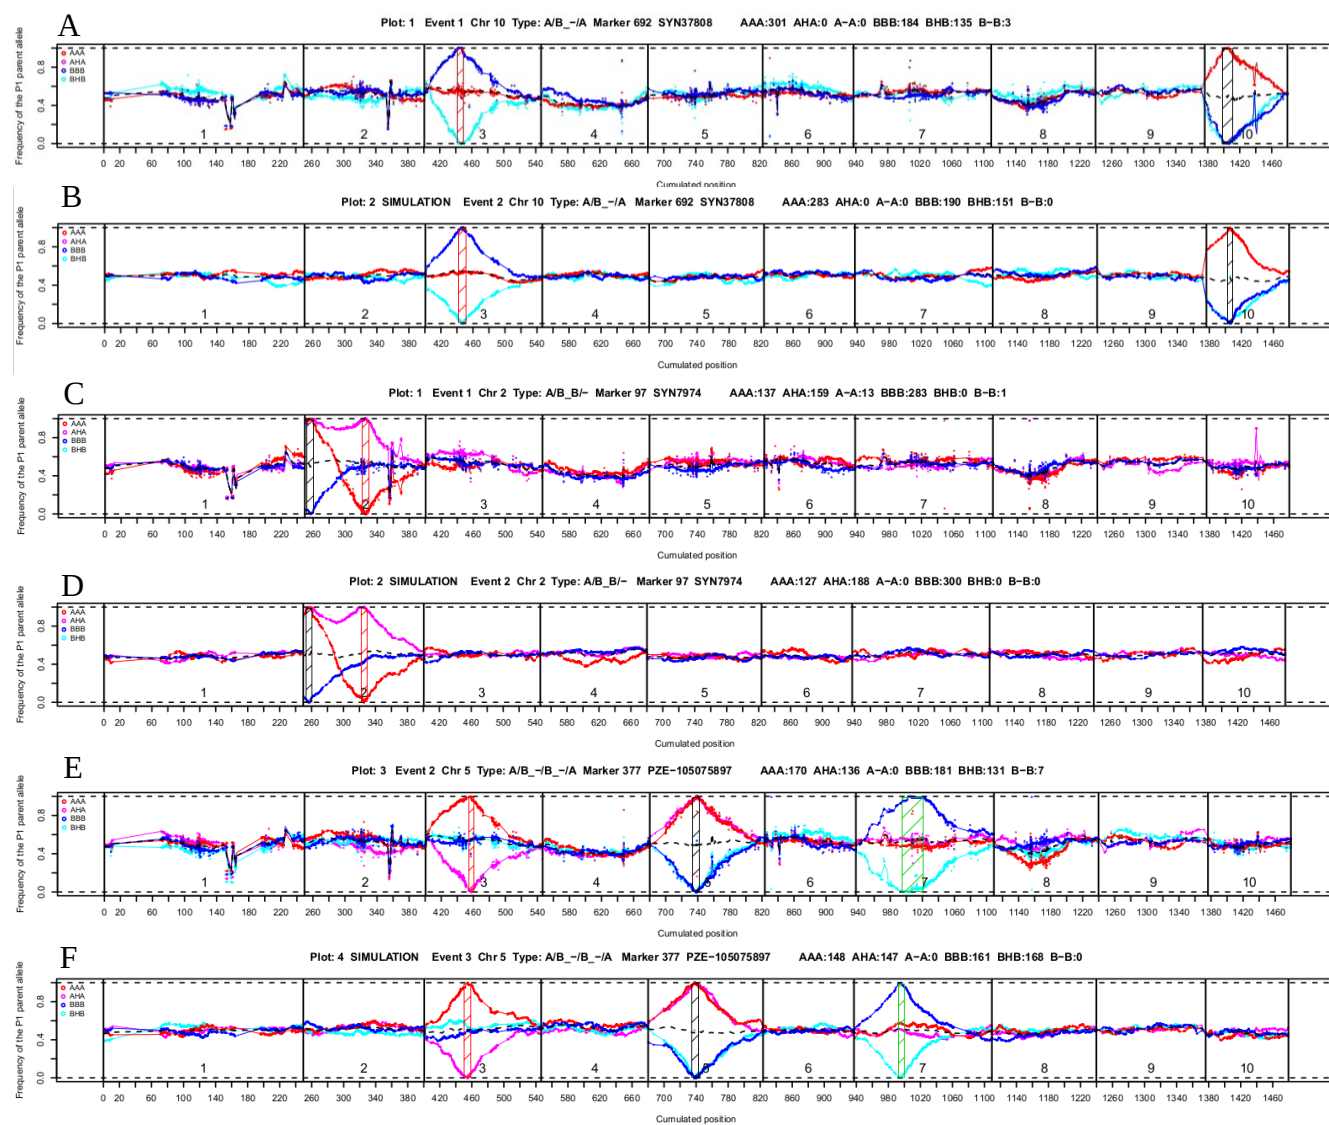

Figure 2.

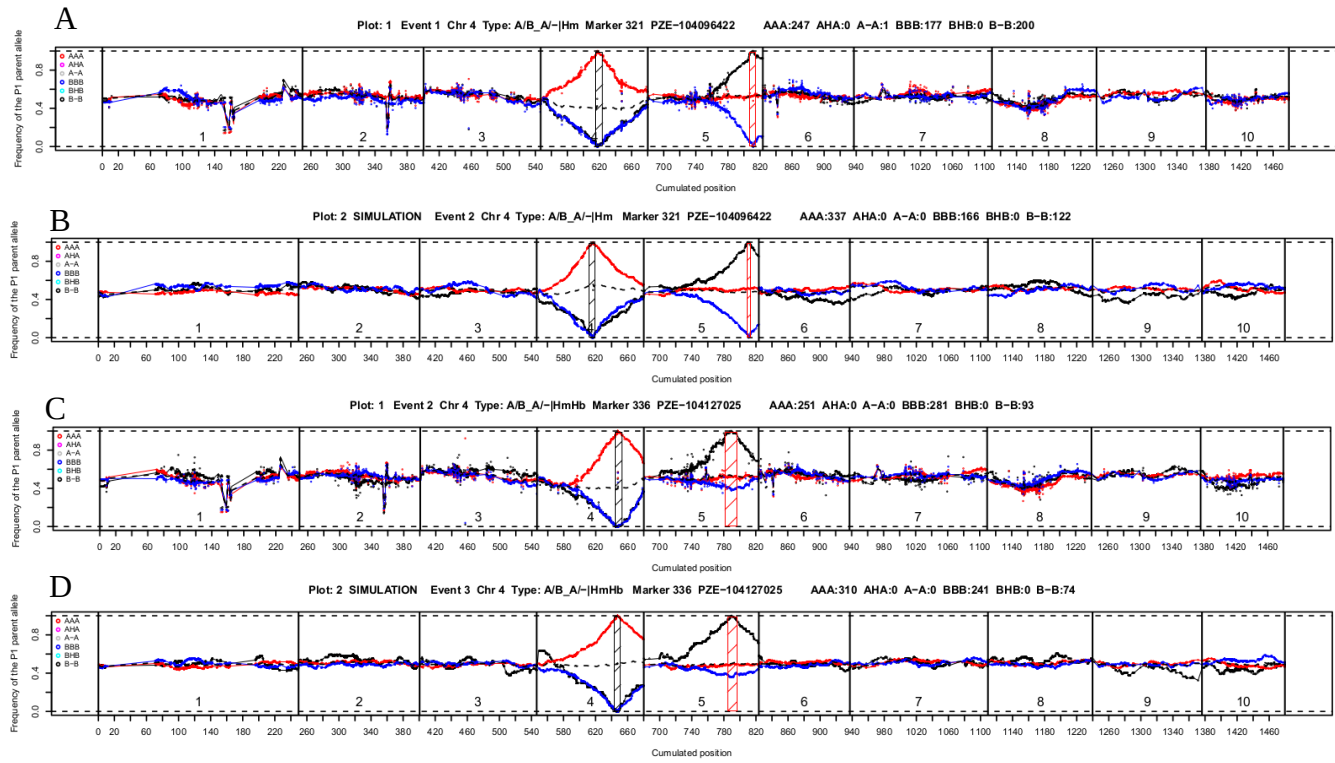

**Figure 3.**

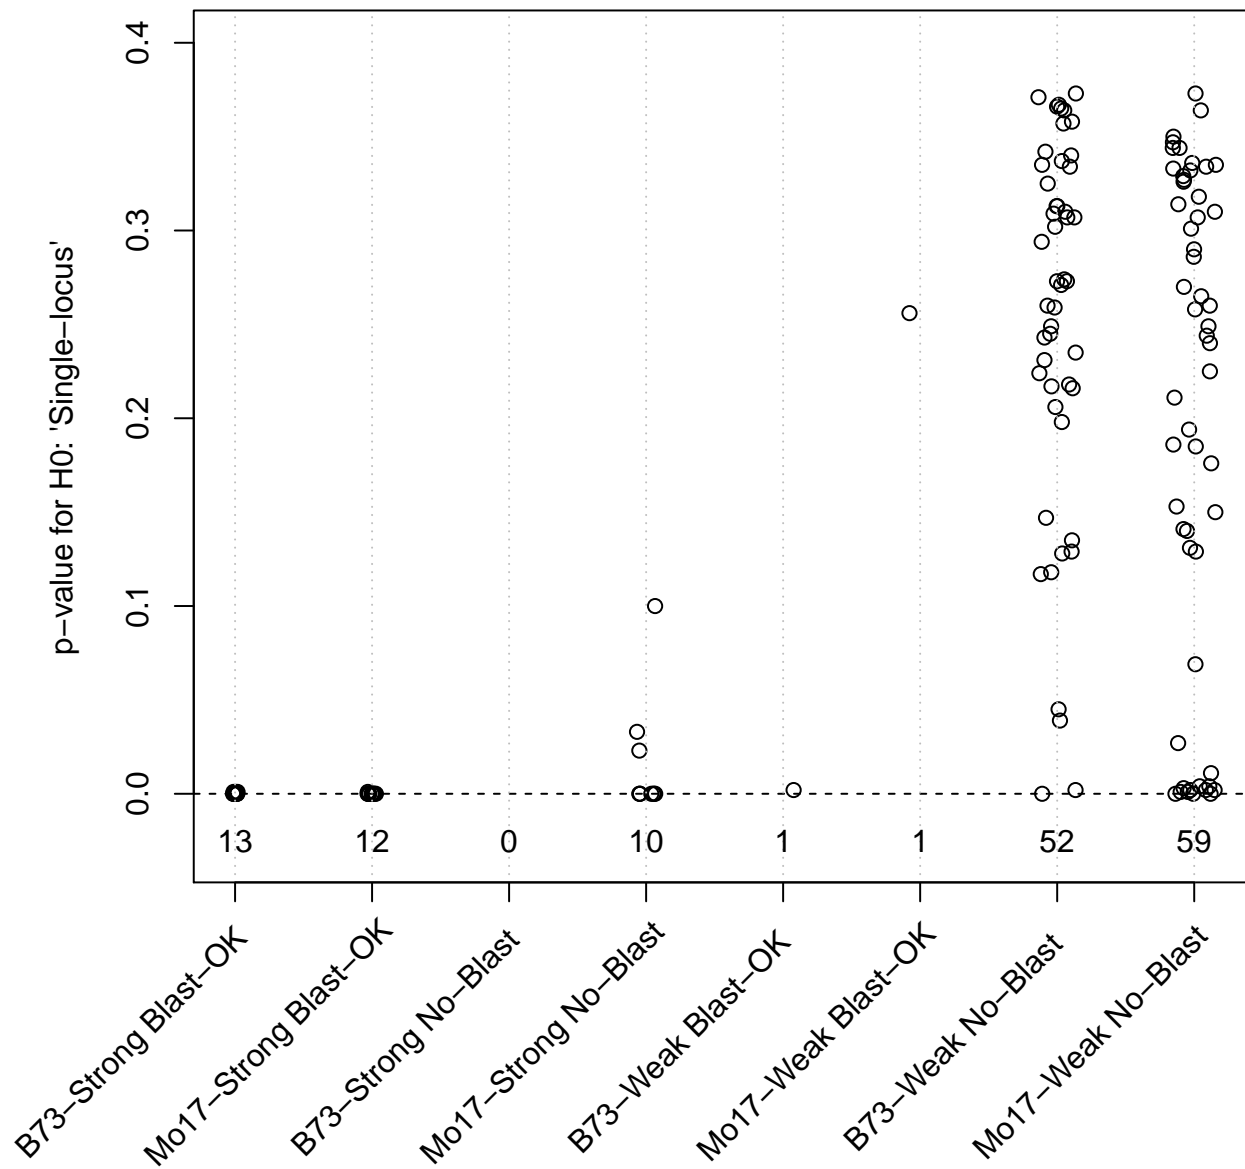

Figure 4.
